# Supplementary material for: Cloning of the Soybean GmNHL1 Gene and Functional Analysis under Salt Stress
Source: MDPI journal article supplement (doi:10.3390/plants12223869), 2023-11-16
Supplement: s1 [file s1]

Table S1. PCR primers were detected

| Name                    | Sequence (5' -3')                       |
|-------------------------|-----------------------------------------|
| <i>Gm NHL1-S</i>        | TTCTCAGCCAAACAATCC                      |
| <i>Gm NHL1-AS</i>       | TAGGGCTGACGGTGAAGAA                     |
| <i>Gm NHL1-S</i>        | agaacacgggggactcttgaTTCTCAGCCAAACAATCC  |
| <i>GmNHL1-AS</i>        | cgatcggggaaattcgagctTAGGGCTGACGGTGAAGAA |
| 1302AS                  | ATGGTACAGAAAAAGGTTCTTTC                 |
| 1302S                   | CACTTTTTTGGTCATTACATACGCTC              |
| Bar-S                   | TCAAATCTCGGTGACGGGC                     |
| Bar-AS                  | ATGAGCCCAGAACGACGCC                     |
| 35S-S                   | TAGAGGACCTAACAGAAC                      |
| 35S-AS                  | CCGTGTTCTCTCCAAATG                      |
| NOS-S                   | GAATCCTGTTGCCGCTCTTG                    |
| NOS-AS                  | TTATCCTAGTTTGCGCGCTA                    |
| Cas9-S                  | CCCAAGAGGAACAGCGATAAG                   |
| Cas9-AS                 | GTCGATGGTGGTGTCAAAGT                    |
| Actin2-S                | CTGAGGTTCTATTCCAGCCATCC                 |
| Actin2-AS               | CCACCACTGAGGACAACATTACC                 |
| QGmNHL1-S               | CTCACCCAAGACGACCTCAAG                   |
| QGmNHL1-AS              | ATGCCGGACTCGACGTACTC                    |
|                         |                                         |
| Target Sequence+PAM     | SG Sequence                             |
| GTAGACCGTGACGTCTTGAGG   | GTGAACGGAATTGAACGG                      |
| AGATTACGTAGATTTCGAGGCGG | GTGTTTGGAACCCTTGAGAG                    |

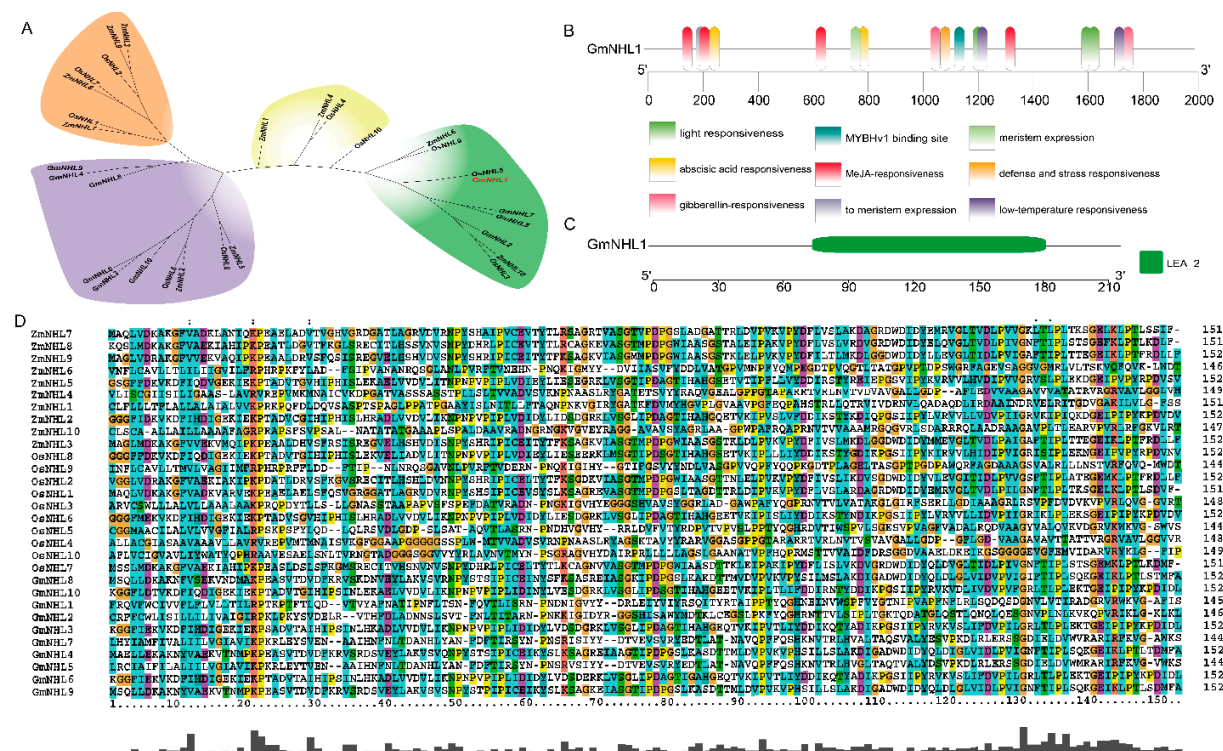

Figure S1: Bioinformatics analysis of *GmNHL1* gene. (A) Phylogenetic tree of *NHL* family genes in rice, corn and soybean; (B) Analysis of cis-acting elements in promoter region; (C) Conserved domain of *GmNHL1* gene analyses; (D) Multiple sequence alignment of *NHL* family genes in rice, corn and soybean
